# Supplementary material for: Increased Survival In Puppies Affected By Canine Parvovirus Type II Using An Immunomodulator As A Therapeutic Aid
Source: Research Square preprint supplement (doi:10.21203/rs.3.rs-648088/v1), 2021-07-08
Supplement: Supplementary file 1 [file 25e82e8e638fd1aabdcba847.docx]

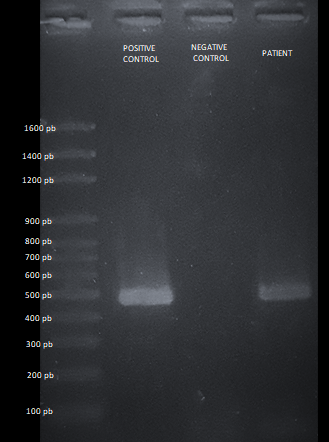


**S3.** Representative figure of a positive result for CPV-2 belonging to a patient in the CT + I group. A positive result is determined by a 466-bp amplicon.
