# Supplementary material for: Increased Survival In Puppies Affected By Canine Parvovirus Type II Using An Immunomodulator As A Therapeutic Aid
Source: Research Square preprint supplement (doi:10.21203/rs.3.rs-648088/v1), 2021-07-08
Supplement: Supplementary file 2 [file a7771f66234195c177ef0a98.docx]

**S2.** Evaluated clinical parameters and numerical scale to determine the severity of the disease in patients with CPE and sepsis.

| Parameter | Findings Score | |
| --- | --- | --- |
| Rectal temperature | ≥ 39.5°C | 1 |
| 37.1–37.4°C | 2 |
| ≤ 37°C | 3 |
| State of mind | Responsive and alert | 1 |
| Depression | 3 |
| Comma | 4 |
| Dehydration percentage | 5–6% | 1 |
| 7–9% | 3 |
| > 10% | 4 |
| Feces | Pasty stool | 1 |
| Mucoid diarrhea | 2 |
| Hemorrhagic diarrhea | 4 |
| Abdominal pain | Light | 1 |
| Moderate | 2 |
| Severe | 3 |
| Vomiting | Vomiting | 2 |
| Hematemesis | 3 |
| Death | --- | 20 |
